# Supplementary material for: Observations and implications of liquid–liquid phase separation at highrelative humidities in secondary organic material produced by α -pinene ozonolysis without inorganic salts
Source: Copernicus journal article supplement (doi:10.5194/acp-16-7969-2016), 2016-07-01
Supplement: Supplementary file 1 [file acp-16-7969-2016-supplement.zip]

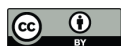

## *Supplement of*

# **Observations and implications of liquid–liquid phase separation at high relative humidities in secondary organic material produced by $\alpha$ -pinene ozonolysis without inorganic salts**

**L. Renbaum-Wolff et al.**

*Correspondence to:* Allan K. Bertram ([bertram@chem.ubc.ca](mailto:bertram@chem.ubc.ca)) and Scot T. Martin ([scot\\_martin@harvard.edu](mailto:scot_martin@harvard.edu))

- [acp-16-7969-2016-supplement-title-page.pdf](#)
- [Movie S1\\_a pinene LLPS low conc from 90 to 100.avi](#)
- [Movie S3\\_a pinene LLPS high mass\\_92 to 100RH.avi](#)
- [Movie S4\\_a pinene LLPS high mass from 99 to 89.avi](#)
- [Moview S2\\_a pinene LLPS low conc from 100 to 90.avi](#)

The copyright of individual parts of the supplement might differ from the CC-BY 3.0 licence.
